# Supplementary material for: Production of Nematicidal Pinosylvin Stilbenes in Cell Suspension Cultures of Pinus koraiensis by Fungal Elicitation
Source: MDPI journal article supplement (doi:10.3390/plants11212933), 2022-10-31
Supplement: s1 [file s1]

Table S1. List of primers for qRT-PCR analysis involved in *P. koraiensis* stilbene biosynthesis.

| Genes | Primers                 |                          |
|-------|-------------------------|--------------------------|
| PkSTS | F:ACGGTGCCTCCAGCGAAGCA  | R: CCTGAGAGAGGTAGGGCTC   |
| PkPMT | F: GCCCTTTCCCGCATTCTTTC | R: TGCTGAGATTGGTAAGCCCG  |
| Actin | F: CTTGCTGGGCGAGATTGAC  | R: AGCTGTCTCAAGCTCCTGTTC |
